# Supplementary material
Source: PubMed Central journal article supplement (PMC5564318)
Supplement: NIHMS891828-supplement-S2.pdf [file NIHMS891828-supplement-S2.pdf]

## Supporting information

Table 2S. A partial list of up-regulated proteins in PANC-1

| Proteins                                                        | Functional annotation <sup>a</sup> | Accession number | Average spectra count |        |
|-----------------------------------------------------------------|------------------------------------|------------------|-----------------------|--------|
|                                                                 |                                    |                  | normal duct           | PANC-1 |
| <b>Cell structure proteins</b>                                  |                                    |                  |                       |        |
| microfilament and actin filament cross-linker protein isoform a | actin binding                      | 33188445         | 3.0                   | 12.7   |
| profilin 1                                                      | actin binding                      | 4826898          | 32.7                  | 74.0   |
| coactosin-like 1                                                | actin binding                      | 21624607         | 0.0                   | 15.7   |
| emerin                                                          | actin binding                      | 4557553          | 2.0                   | 11.0   |
| inverted formin 2 isoform 1                                     | actin binding                      | 149999380        | 0.0                   | 8.7    |
| coronin, actin binding protein, 1C isoform 1                    | actin binding                      | 7656991          | 0.0                   | 4.7    |
| calponin 2 isoform a                                            | actin binding                      | 4758018          | 0.0                   | 3.7    |
| coronin, actin binding protein, 1B                              | actin binding                      | 14149734         | 0.0                   | 3.0    |
| filamin B, beta (actin binding protein 278)                     | actin binding                      | 105990514        | 116.7                 | 237    |
| erythrocyte membrane protein band 4.1-like 2 isoform a          | actin binding                      | 4503579          | 0.0                   | 5.3    |
| cofilin 1 (non-muscle)                                          | actin organization                 | 5031635          | 11.0                  | 36.0   |
| fascin 1                                                        | actin organization                 | 4507115          | 0.0                   | 22.7   |
| microtubule-associated protein 1B                               | cytoskeleton                       | 153945728        | 0.0                   | 5.3    |
| thymosin-like 3                                                 | cytoskeleton                       | 34013530         | 4.0                   | 22.0   |
| tubulin alpha 6                                                 | microtubules                       | 14389309         | 67.7                  | 214.7  |
| tubulin, beta                                                   | microtubules                       | 29788785         | 26.7                  | 66.0   |
| stathmin 1 isoform a                                            | tubulin binding                    | 5031851          | 0.0                   | 10.0   |
| vimentin                                                        | intermediate filaments             | 62414289         | 22.3                  | 226.7  |
| peripherin                                                      | intermediate filaments             | 21264345         | 0.3                   | 42.7   |
| keratin 25D                                                     | intermediate filaments             | 114431246        | 1.3                   | 11.7   |
| desmin                                                          | intermediate filaments             | 55749932         | 2.0                   | 9.7    |
| annexin I                                                       | membrane scaffold                  | 4502101          | 17.7                  | 37.7   |
| myoferlin isoform a                                             | plasmalemma repair                 | 7305053          | 2.0                   | 55.0   |
| paxillin isoform 1                                              | cell junction                      | 170932514        | 0.0                   | 10.0   |
| plectin 1 isoform 1                                             | cell junction                      | 47607492         | 78.7                  | 185.3  |
| integrin alpha 3 isoform b precursor                            | cell adhesion                      | 6006011          | 0.0                   | 4.0    |
| integrin, beta 5                                                | cell adhesion                      | 20127446         | 0.0                   | 5.3    |
| intercellular adhesion molecule 1 precursor                     | cell adhesion                      | 167466198        | 0.0                   | 5.7    |
| trophoblast glycoprotein                                        | cell adhesion                      | 5729718          | 0.0                   | 5.3    |
| milk fat globule-EGF factor 8 protein isoform a                 | cell adhesion                      | 167830475        | 0.0                   | 4.0    |
| nucleoporin 93kDa                                               | nuclear pore complex               | 208609990        | 0.0                   | 13.3   |
| dynein, cytoplasmic 1, light intermediate chain 1               | motor protein                      | 166795297        | 0.0                   | 3.3    |
| <b>Transport proteins</b>                                       |                                    |                  |                       |        |
| RAN binding protein 1                                           | protein transport                  | 4506407          | 1.7                   | 8.0    |
| CSE1 chromosome segregation 1-like protein                      | protein transport                  | 29029559         | 8.0                   | 35.0   |
| SEC13 protein isoform 1                                         | protein transport                  | 34335134         | 0.0                   | 3.7    |
| SEC24-related protein C                                         | protein transport                  | 38373669         | 2.3                   | 12.7   |
| RAB7, member RAS oncogene family                                | protein transport                  | 34147513         | 3.0                   | 12.3   |
| secretory carrier membrane protein 3 isoform 1                  | protein transport                  | 16445419         | 1.3                   | 6.0    |
| translocase of inner mitochondrial membrane 44                  | protein transport                  | 33636719         | 0.0                   | 5.3    |
| sorting nexin 3 isoform b                                       | protein transport                  | 23111041         | 0.0                   | 4.3    |
| nucleoporin 155kDa isoform 1                                    | protein transport                  | 24430149         | 0.0                   | 4.3    |

|                                                                          |                            |           |      |       |
|--------------------------------------------------------------------------|----------------------------|-----------|------|-------|
| karyopherin alpha 1                                                      | nuclear protein import     | 222144293 | 0.0  | 4.3   |
| karyopherin alpha 6                                                      | nuclear protein import     | 6912478   | 0.0  | 6.3   |
| karyopherin beta 1                                                       | nuclear protein import     | 19923142  | 18.3 | 48.3  |
| importin 4                                                               | nuclear protein import     | 62460637  | 0.3  | 10.0  |
| transportin 1 isoform 1                                                  | nuclear protein import     | 133925811 | 0.0  | 4.3   |
| importin 7                                                               | nuclear protein import     | 5453998   | 2.0  | 33.0  |
| importin 9                                                               | nuclear protein import     | 21361659  | 0.0  | 3.7   |
| exportin 5                                                               | nuclear protein export     | 22748937  | 0.0  | 8.7   |
| solute carrier family 3, member 2 isoform a                              | solute carrier             | 61744475  | 0.0  | 8.7   |
| solute carrier family 4, sodium bicarbonate cotransporter, member 7      | solute carrier             | 134288865 | 0.0  | 3.7   |
| solute carrier family 25, member 5                                       | solute carrier             | 156071459 | 8.3  | 24.3  |
| solute carrier family 26 member 2                                        | solute carrier             | 100913030 | 0.0  | 4.0   |
| chloride intracellular channel 4                                         | ion transport              | 7330335   | 0.0  | 9.0   |
| inositol 1,4,5-triphosphate receptor, type 3                             | calcium transport          | 153945846 | 0.0  | 6.0   |
| ATPase, Ca++ transporting, ubiquitous isoform e                          | calcium transport          | 28373105  | 0.3  | 4.0   |
| cellular retinoic acid binding protein 2                                 | retinoic acid transport    | 4503029   | 0.0  | 7.3   |
| EH-domain containing 1                                                   | endocytic recycling        | 30240932  | 0.0  | 15.3  |
| dynamamin 1-like isoform 2                                               | vesicular transport        | 171460916 | 2.0  | 10.3  |
| <b>Chromosome and transcription</b>                                      |                            |           |      |       |
| proliferating cell nuclear antigen (PCNA)                                | DNA replication            | 4505641   | 0.0  | 9.0   |
| RuvB-like 1                                                              | DNA helicase               | 4506753   | 2.7  | 17.7  |
| RuvB-like 2                                                              | DNA helicase               | 5730023   | 0.7  | 14.0  |
| high-mobility group box 3                                                | DNA binding                | 71143137  | 0.0  | 8.3   |
| minichromosome maintenance complex component 2                           | minichromosome maintenance | 33356547  | 0.0  | 9.3   |
| minichromosome maintenance complex component 3                           | minichromosome maintenance | 6631095   | 0.0  | 5.0   |
| minichromosome maintenance complex component 4                           | minichromosome maintenance | 33469917  | 0.0  | 3.3   |
| structural maintenance of chromosomes flexible hinge domain containing 1 | chromosome organization    | 148839305 | 0.0  | 4.7   |
| AHNAK nucleoprotein 2                                                    | nucleic acid binding       | 156766050 | 0.0  | 19.7  |
| AHNAK nucleoprotein isoform 1                                            | nucleic acid binding       | 61743954  | 53.0 | 201.0 |
| DEAD (Asp-Glu-Ala-Asp) box polypeptide 47 isoform 1                      | nucleic acid binding       | 20149629  | 0.0  | 4.7   |
| RNA binding motif protein 3                                              | RNA binding                | 5803137   | 2.0  | 8.7   |
| poly(A) binding protein, cytoplasmic 1                                   | RNA binding                | 46367787  | 0.0  | 3.7   |
| poly A binding protein, cytoplasmic 4 isoform 1                          | RNA binding                | 208431833 | 6.3  | 20.3  |
| U2 (RNU2) small nuclear RNA auxiliary factor 2 isoform a                 | RNA binding                | 6005926   | 5.7  | 18.0  |
| insulin-like growth factor 2 mRNA binding protein 3                      | RNA binding                | 30795212  | 0.0  | 10.7  |
| DEAD (Asp-Glu-Ala-Asp) box polypeptide 21                                | RNA binding                | 50659095  | 0.0  | 19.3  |
| insulin-like growth factor 2 mRNA binding protein 1 isoform 1            | mRNA binding               | 56237027  | 0.0  | 4.3   |
| insulin-like growth factor 2 mRNA binding protein 2 isoform a            | mRNA binding               | 64085377  | 0.0  | 5.3   |
| leucine-rich PPR motif-containing protein                                | transcription              | 31621305  | 15.0 | 66.0  |
| MYB binding protein 1a isoform 2                                         | transcription              | 157694492 | 0.0  | 12.7  |
| nucleolin                                                                | RNA binding                | 55956788  | 20.3 | 42.7  |
| elongin B isoform a                                                      | transcription              | 6005890   | 0.0  | 8.7   |
| elongin C                                                                | transcription              | 5032161   | 0.0  | 4.0   |
| SRA stem-loop-interacting RNA-binding protein                            | transcription              | 13654278  | 0.0  | 4.7   |
| basic transcription factor 3 isoform A                                   | transcription              | 83641885  | 0.7  | 4.0   |

|                                                                          |                                            |           |      |       |
|--------------------------------------------------------------------------|--------------------------------------------|-----------|------|-------|
| splicing factor 3a, subunit 3                                            | transcription and splicing                 | 5803167   | 1.0  | 6.0   |
| splicing factor 3b, subunit 3                                            | transcription and splicing                 | 54112121  | 2.7  | 11.7  |
| tripartite motif-containing 28 protein                                   | transcription regulation                   | 5032179   | 5.7  | 18.7  |
| transcription factor B2, mitochondrial                                   | transcription                              | 11641289  | 0.0  | 3.3   |
| nuclease sensitive element binding protein 1                             | transcription                              | 34098946  | 0.0  | 3.3   |
| THO complex 2 isoform 2                                                  | mRNA splicing                              | 52486999  | 0.0  | 6.7   |
| THO complex 4                                                            | mRNA splicing                              | 55770864  | 0.3  | 7.7   |
| small nuclear ribonucleoprotein D1 polypeptide 16kDa                     | mRNA splicing                              | 5902102   | 2.3  | 11.7  |
| U5 snRNP-specific protein                                                | mRNA splicing                              | 91208426  | 2.0  | 17.3  |
| poly-U binding splicing factor 60KDa isoform a                           | mRNA splicing                              | 17978512  | 0.0  | 9.3   |
| splicing coactivator subunit SRm300                                      | mRNA splicing                              | 118572613 | 0.3  | 5.7   |
| SERPINE1 mRNA binding protein 1 isoform 1                                | mRNA stability                             | 66346679  | 3    | 10    |
| heterogeneous nuclear ribonucleoprotein A2/B1 isoform A2                 | mRNA processing                            | 4504447   | 27.3 | 88.7  |
| superkiller viralicidic activity 2-like 2                                | mRNA processing                            | 193211480 | 0.7  | 4.7   |
| <b>Translation</b>                                                       |                                            |           |      |       |
| GCN1 general control of amino-acid synthesis 1-like 1                    | translation                                | 54607053  | 16.0 | 39.3  |
| suppressor of Ty 5 homolog isoform a                                     | translation                                | 20149524  | 0.0  | 7.7   |
| eukaryotic translation initiation factor 3, subunit 1 alpha, 35kDa       | translation                                | 83281438  | 0.0  | 3.7   |
| eukaryotic translation initiation factor 2 beta                          | translation                                | 29826335  | 0.3  | 4.3   |
| eukaryotic translation initiation factor 3, subunit C                    | translation                                | 4503525   | 0.7  | 7.7   |
| eukaryotic translation initiation factor 3 subunit D                     | translation                                | 4503523   | 0.0  | 10.0  |
| eukaryotic translation initiation factor 3, subunit M                    | translation                                | 23397429  | 0.0  | 6.3   |
| eukaryotic translation initiation factor 3, subunit 9 eta, 116kDa        | translation                                | 83367072  | 4.3  | 19.3  |
| eukaryotic translation initiation factor 3, subunit 10 theta, 150/170kDa | translation                                | 4503509   | 2.7  | 22.0  |
| eukaryotic translation initiation factor 4 gamma, 1 isoform 4            | translation                                | 38201619  | 3.0  | 22.0  |
| eukaryotic translation initiation factor 4 gamma, 2 isoform 1            | translation                                | 4503539   | 2.0  | 13.0  |
| eukaryotic translation initiation factor 5A-like 1                       | translation                                | 153791632 | 8.0  | 23.7  |
| eukaryotic translation initiation factor 5B                              | translation                                | 84043963  | 1.3  | 7.0   |
| eukaryotic translation elongation factor 1 alpha 1                       | translation                                | 4503471   | 39.7 | 84.7  |
| eukaryotic translation elongation factor 1 alpha 2                       | translation                                | 4503475   | 14.3 | 110.3 |
| eukaryotic translation elongation factor 1 gamma                         | translation                                | 4503481   | 16.0 | 36.0  |
| eukaryotic translation elongation factor 1 delta isoform 1               | translation                                | 25453474  | 0.3  | 4.0   |
| eukaryotic translation elongation factor 1 delta isoform 4               | translation                                | 194239729 | 2.0  | 9.0   |
| eukaryotic translation termination factor 1                              | translation                                | 4759034   | 1.3  | 8.0   |
| aminoacyl tRNA synthetase complex-interacting multifunctional protein 2  | aminoacyl-tRNA synthetase complex assembly | 11125770  | 1.7  | 7.0   |
| glycyl-tRNA synthetase                                                   | aminoacyl-tRNA synthetase                  | 116805340 | 4.3  | 33.0  |
| alanyl-tRNA synthetase                                                   | aminoacyl-tRNA synthetase                  | 109148542 | 10.3 | 41.3  |
| glutamyl-prolyl tRNA synthetase                                          | aminoacyl-tRNA synthetase                  | 62241042  | 7.3  | 35.7  |
| methionyl-tRNA synthetase                                                | aminoacyl-tRNA synthetase                  | 14043022  | 1.0  | 23.3  |
| threonyl-tRNA synthetase                                                 | aminoacyl-tRNA synthetase                  | 38202255  | 4.0  | 19.7  |
| arginyl-tRNA synthetase                                                  | aminoacyl-tRNA synthetase                  | 15149476  | 2.3  | 14.0  |
| cysteinyl-tRNA synthetase isoform b                                      | aminoacyl-tRNA synthetase                  | 10835051  | 0.0  | 13.0  |
| seryl-tRNA synthetase 2 isoform b precursor                              | aminoacyl-tRNA synthetase                  | 8923421   | 0.0  | 5.7   |

|                                                 |                              |           |      |       |
|-------------------------------------------------|------------------------------|-----------|------|-------|
| tyrosyl-tRNA synthetase                         | aminoacyl-tRNA synthetase    | 4507947   | 0.0  | 11.0  |
| isoleucine tRNA synthetase                      | aminoacyl-tRNA synthetase    | 94721241  | 1.3  | 7.7   |
| tryptophanyl-tRNA synthetase isoform a          | aminoacyl-tRNA synthetase    | 47419914  | 0.0  | 7.0   |
| lysyl-tRNA synthetase isoform 2                 | aminoacyl-tRNA synthetase    | 5031815   | 1.7  | 6.7   |
| phenylalanyl-tRNA synthetase, alpha subunit     | aminoacyl-tRNA synthetase    | 4758340   | 1.0  | 5.0   |
| phenylalanyl-tRNA synthetase, beta subunit      | aminoacyl-tRNA synthetase    | 124028525 | 0.0  | 6.7   |
| ribosomal protein L3 isoform b                  | subunit of ribosome          | 76496472  | 0.0  | 26.0  |
| ribosomal protein L4                            | subunit of ribosome          | 16579885  | 0.0  | 17.0  |
| ribosomal protein L5                            | subunit of ribosome          | 14591909  | 0.0  | 9.0   |
| ribosomal protein L6                            | subunit of ribosome          | 16753227  | 0.3  | 18.3  |
| ribosomal protein L7                            | subunit of ribosome          | 15431301  | 0.7  | 27.3  |
| ribosomal protein L7a                           | subunit of ribosome          | 4506661   | 0.0  | 13.3  |
| ribosomal protein L8                            | subunit of ribosome          | 15431306  | 0.0  | 20.0  |
| ribosomal protein L10                           | subunit of ribosome          | 223890243 | 0.0  | 8.3   |
| ribosomal protein L10a                          | subunit of ribosome          | 15431288  | 0.0  | 6.3   |
| ribosomal protein L13                           | subunit of ribosome          | 15431295  | 0.0  | 5.3   |
| ribosomal protein L14                           | subunit of ribosome          | 78000181  | 0.3  | 11.0  |
| ribosomal protein L17                           | subunit of ribosome          | 4506617   | 0.0  | 8.0   |
| ribosomal protein L18                           | subunit of ribosome          | 4506607   | 0.0  | 9.0   |
| ribosomal protein L18a                          | subunit of ribosome          | 11415026  | 0.0  | 6.0   |
| ribosomal protein L19                           | subunit of ribosome          | 4506609   | 0.0  | 4.7   |
| ribosomal protein L21                           | subunit of ribosome          | 18104948  | 0.0  | 5.0   |
| ribosomal protein L23                           | subunit of ribosome          | 4506605   | 2.3  | 10.7  |
| ribosomal protein L23a                          | subunit of ribosome          | 17105394  | 0.0  | 9.7   |
| ribosomal protein L24                           | subunit of ribosome          | 4506619   | 0.0  | 5.3   |
| ribosomal protein L27a                          | subunit of ribosome          | 4506625   | 0.0  | 5.7   |
| ribosomal protein L31 isoform 1                 | subunit of ribosome          | 4506633   | 0.0  | 7.0   |
| ribosomal protein L32                           | subunit of ribosome          | 4506635   | 0.0  | 5.3   |
| ribosomal protein L36                           | subunit of ribosome          | 16117796  | 0.0  | 6.0   |
| ribosomal protein L37a                          | Subunit of ribosome          | 4506643   | 0.0  | 4.0   |
| ribosomal protein S2                            | subunit of ribosome          | 15055539  | 5.7  | 27.0  |
| ribosomal protein S3a                           | subunit of ribosome          | 4506723   | 3.0  | 14.7  |
| ribosomal protein S4, X-linked X isoform        | subunit of ribosome          | 4506725   | 3.7  | 14.3  |
| ribosomal protein S6                            | subunit of ribosome          | 17158044  | 0.0  | 11.7  |
| ribosomal protein S8                            | subunit of ribosome          | 4506743   | 0.0  | 14.0  |
| ribosomal protein S9                            | subunit of ribosome          | 14141193  | 0.0  | 8.3   |
| ribosomal protein S11                           | subunit of ribosome          | 4506681   | 0.0  | 6.7   |
| ribosomal protein S13                           | subunit of ribosome          | 4506685   | 0.0  | 11.0  |
| ribosomal protein S14                           | subunit of ribosome          | 5032051   | 1.0  | 11.0  |
| ribosomal protein S15                           | subunit of ribosome          | 4506687   | 2.0  | 9.7   |
| ribosomal protein S18                           | subunit of ribosome          | 11968182  | 4.0  | 15.7  |
| ribosomal protein S23                           | subunit of ribosome          | 4506701   | 0.0  | 4.0   |
| ribosomal protein S24 isoform a                 | subunit of ribosome          | 14916501  | 0.0  | 9.3   |
| ribosomal protein S25                           | subunit of ribosome          | 4506707   | 0.0  | 4.3   |
| ribosomal protein S29 isoform 2                 | subunit of ribosome          | 71772583  | 0.0  | 8.3   |
| protein BAP28                                   | ribosome biosynthesis        | 73695475  | 0.3  | 6.7   |
| FK506 binding protein 10                        | protein folding at synthesis | 192448443 | 0.0  | 4.3   |
| <b>Heat shock proteins and chaperones</b>       |                              |           |      |       |
| SEC63-like protein                              | chaperone                    | 6005872   | 1.3  | 9.0   |
| chaperonin                                      | chaperone                    | 31542947  | 85.0 | 182.7 |
| heat shock 90kDa protein 1, beta                | chaperone                    | 20149594  | 52.3 | 129.7 |
| hypoxia up-regulated 1 precursor                | chaperone                    | 5453832   | 22.3 | 47.3  |
| chaperonin containing TCP1, subunit 3 isoform a | chaperone                    | 63162572  | 17.7 | 38.0  |

|                                                                            |                                      |           |      |      |
|----------------------------------------------------------------------------|--------------------------------------|-----------|------|------|
| chaperonin containing TCP1, subunit 5 (epsilon)                            | chaperone                            | 24307939  | 10.0 | 36.7 |
| chaperonin containing TCP1, subunit 6A isoform a                           | chaperone                            | 4502643   | 11.3 | 28.7 |
| chaperonin containing TCP1, subunit 7 isoform a                            | chaperone                            | 5453607   | 11.3 | 35.3 |
| chaperonin containing TCP1, subunit 8 (theta)                              | chaperone                            | 48762932  | 16.0 | 33.0 |
| heat shock 70kDa protein 4                                                 | chaperone                            | 38327039  | 9.3  | 30.0 |
| heat shock 70kDa protein 9                                                 | chaperone                            | 24234688  | 28.0 | 63.3 |
| DnaJ (Hsp40) homolog, subfamily B, member 1                                | chaperone                            | 5453690   | 0.7  | 5.0  |
| von Hippel-Lindau binding protein 1                                        | protein folding                      | 4507873   | 0.7  | 11.7 |
| cysteine and histidine-rich domain-containing protein 1 isoform a          | protein folding                      | 221316566 | 0.0  | 4.3  |
| prefoldin subunit 5 isoform alpha                                          | protein folding                      | 22202633  | 0.0  | 3.7  |
| <b>Protein modifications</b>                                               |                                      |           |      |      |
| SUMO1 activating enzyme subunit 1 isoform a                                | protein modification                 | 4885585   | 1.0  | 4.0  |
| SUMO-1 activating enzyme subunit 2                                         | protein modification                 | 4885649   | 0.0  | 7.3  |
| RAN binding protein 2                                                      | protein modification                 | 150418007 | 0.0  | 3.3  |
| procollagen-lysine, 2-oxoglutarate 5-dioxygenase 3 precursor               | protein modification                 | 4505891   | 0.3  | 4.0  |
| calcylin binding protein isoform 2                                         | Ubl conjugation                      | 60218913  | 0.0  | 6.7  |
| ubiquitin specific protease 14 isoform a                                   | proteasome-associated deubiquitinase | 4827050   | 3.3  | 14.7 |
| retinoblastoma-associated factor 600                                       | E3 ubiquitin-protein ligase          | 82659109  | 0.0  | 7.7  |
| zinc finger, C3HC type 1                                                   | protein modification                 | 66348045  | 0.3  | 4.0  |
| ubiquitin-conjugating enzyme E2M                                           | protein modification                 | 4507791   | 0.0  | 3.3  |
| aminoadipate-semialdehyde dehydrogenase-phosphopantetheinyl transferase    | protein modification                 | 20357568  | 0.0  | 4.0  |
| protein O-fucosyltransferase 1 isoform 2 precursor                         | protein glycosylation                | 27436891  | 0.0  | 4.0  |
| phosphatidylinositol glycan anchor biosynthesis, class U                   | GPI-anchor biosynthesis              | 17998700  | 0.0  | 3.7  |
| p21-activated kinase 4 isoform 1                                           | kinase                               | 5031975   | 0.0  | 5.0  |
| AKT2 kinase                                                                | kinase                               | 4502023   | 0.0  | 3.3  |
| integrin-linked kinase-associated protein phosphatase 2C                   | phosphatase                          | 13540531  | 0.0  | 3.0  |
| HMT1 hnRNP methyltransferase-like 2 isoform 2                              | methyltransferase                    | 150456457 | 0.3  | 4.0  |
| meningioma expressed antigen 5 (hyaluronidase) isoform a                   | acyltransferase                      | 11024698  | 0.0  | 3.3  |
| protein O-fucosyltransferase 1 isoform 1 precursor                         | protein modification                 | 27436889  | 0.0  | 3.0  |
| <b>Cell proliferation and apoptosis</b>                                    |                                      |           |      |      |
| acidic (leucine-rich) nuclear phosphoprotein 32 family, member E isoform 3 | cell cycle                           | 210147571 | 1.3  | 6.0  |
| non-SMC condensin I complex, subunit D2                                    | cell cycle                           | 178056552 | 0.0  | 5.3  |
| enhancer of rudimentary homolog                                            | cell cycle                           | 4758302   | 0.7  | 4.7  |
| ADP-ribosylation factor-like 2                                             | cell cycle                           | 148612885 | 0.0  | 3.0  |
| ADP-ribosylation factor-like 3                                             | cell cycle                           | 4757774   | 0.0  | 3.7  |
| CDC5-like                                                                  | cell cycle                           | 11067747  | 0.0  | 3.0  |
| four and a half LIM domains 1 isoform 2                                    | cell differentiation                 | 21361122  | 0.0  | 7.3  |
| ephrin receptor EphA2                                                      | apoptosis                            | 32967311  | 0.0  | 5.7  |
| programmed cell death 8 isoform 5                                          | apoptosis                            | 195927006 | 0.0  | 6.3  |
| galectin-1                                                                 | apoptosis, cell proliferation        | 4504981   | 3.7  | 38.7 |
| IKK interacting protein isoform 1                                          | apoptosis                            | 24233517  | 0.0  | 3.7  |
| CLPTM1-like                                                                | apoptosis                            | 21359965  | 0.0  | 3.3  |
| FK506-binding protein 8                                                    | apoptosis                            | 52630440  | 0.0  | 3.3  |
| stratifin                                                                  | adapter protein                      | 5454052   | 2.0  | 11.3 |
| nuclear distribution gene C homolog                                        | neurogenesis                         | 5729953   | 0.0  | 8.3  |
| GDP dissociation inhibitor 1                                               | Rho protein signal                   | 4503971   | 4.0  | 19.7 |

|                                                                            |                                                |           |       |       |
|----------------------------------------------------------------------------|------------------------------------------------|-----------|-------|-------|
|                                                                            | transduction                                   |           |       |       |
| signal transducer and activator of transcription 1 isoform beta (STAT1)    | signal transducer                              | 21536301  | 1.7   | 7.7   |
| epidermal growth factor receptor isoform b precursor                       | EGF signaling pathway                          | 41327732  | 0.0   | 4.0   |
| Other proteins                                                             |                                                |           |       |       |
| anterior gradient 2                                                        | mucus production                               | 5453541   | 0.0   | 27.7  |
| calumenin isoform a precursor                                              | calcium binding                                | 4502551   | 0.0   | 9.3   |
| annexin A2 isoform 2                                                       | calcium binding                                | 209862831 | 152.0 | 299.7 |
| hippocalcin                                                                | calcium binding                                | 19913446  | 0.3   | 4.3   |
| ER lipid raft associated 1                                                 | protein binding                                | 154800487 | 0.0   | 4.3   |
| fatty acid binding protein 5 (psoriasis-associated)                        | fatty acid binding                             | 4557581   | 0.0   | 9.0   |
| glutaredoxin 3                                                             | oxidoreductase                                 | 95113651  | 0.0   | 11.7  |
| NAD(P) dependent steroid dehydrogenase-like                                | oxidoreductase                                 | 8393516   | 0.0   | 4.3   |
| leprecan 1 isoform 1                                                       | oxidoreductase                                 | 186928835 | 0.0   | 4.3   |
| acyl-Coenzyme A dehydrogenase family, member 9                             | oxidoreductase                                 | 21361497  | 0.3   | 4.0   |
| proteasome 26S ATPase subunit 2                                            | proteasome                                     | 4506209   | 2.3   | 11.3  |
| proteasome 26S non-ATPase subunit 3                                        | proteasome                                     | 25777612  | 0.7   | 5.0   |
| proteasome 26S non-ATPase subunit 4                                        | proteasome                                     | 5292161   | 0.3   | 5.3   |
| proteasome beta 5 subunit isoform 1                                        | proteasome                                     | 4506201   | 1.3   | 5.7   |
| biliverdin reductase A                                                     | protoheme degradation                          | 33589854  | 3.0   | 11.7  |
| A kinase (PRKA) anchor protein 12 isoform 2                                | A kinase binding                               | 21493024  | 0.0   | 15.7  |
| protein phosphatase 1, regulatory (inhibitor) subunit 14A                  | protein phosphatase inhibitor                  | 15147250  | 0.0   | 7.0   |
| 5' nucleotidase, ecto                                                      | nucleotidase                                   | 4505467   | 0.0   | 16.3  |
| flap structure-specific endonuclease 1                                     | endonuclease                                   | 4758356   | 1.0   | 4.0   |
| ribonuclease/angiogenin inhibitor                                          | ribonuclease inhibitor                         | 21361547  | 13.0  | 49.0  |
| peroxisomal enoyl-coenzyme A hydratase-like protein                        | possible peroxisomal fatty acid beta-oxidation | 70995211  | 16.3  | 74.0  |
| carboxylesterase 1 isoform c precursor                                     | detoxification of xenobiotics                  | 68508957  | 3.7   | 39.0  |
| membrane alanine aminopeptidase precursor                                  | aminopeptidase                                 | 157266300 | 9.7   | 29.0  |
| endothelin converting enzyme 1 isoform 1                                   | peptidase                                      | 4503443   | 0.0   | 3.7   |
| protein phosphatase 1, catalytic subunit, alpha isoform 1                  | protein phosphatase                            | 4506003   | 0.0   | 3.7   |
| deoxyuridine triphosphatase isoform 1 precursor                            | dUTP diphosphatase                             | 70906441  | 1.7   | 8.0   |
| N-acetyltransferase 10 isoform a                                           | N-acetyltransferase                            | 221316723 | 0.0   | 4.7   |
| transferrin receptor                                                       | cellular iron homeostasis                      | 189458817 | 6.7   | 22.7  |
| leucine rich repeat containing 59                                          | protein binding                                | 40254924  | 3.3   | 13.0  |
| NOL1/NOP2/Sun domain family, member 2                                      | tRNA methyltransferase                         | 39995082  | 0.0   | 8.0   |
| small inducible cytokine subfamily E, member 1 isoform a precursor         | tRNA binding                                   | 45006986  | 1.0   | 4.3   |
| adenosine kinase isoform a                                                 | transferase                                    | 32484973  | 0.0   | 7.7   |
| lysyl hydroxylase 1 precursor                                              | hydroxylysine biosynthesis                     | 32307144  | 0.0   | 7.0   |
| peptidyl arginine deiminase, type II                                       | deiminase                                      | 122939159 | 0.0   | 5.7   |
| transmembrane and coiled-coil domains 1                                    | ER membrane protein                            | 24308133  | 1.0   | 4.0   |
| lysophosphatidylcholine acyltransferase 1                                  | lipid metabolism                               | 33946291  | 0.0   | 3.7   |
| carbamoylphosphate synthetase 2                                            | urea cycle                                     | 18105007  | 0.0   | 3.7   |
| caveolin 1                                                                 | scaffolding protein                            | 15451856  | 0.0   | 3.0   |
| insulin-like growth factor 2 receptor precursor                            | receptor                                       | 119964726 | 1.0   | 8.7   |
| CD97 antigen isoform 1 precursor                                           | receptor                                       | 17978491  | 0.0   | 3.0   |
| spermidine synthase                                                        | spermidine synthesis                           | 63253298  | 0.0   | 3.0   |
| mediator of cell motility 1 isoform 2                                      | cell migration                                 | 212286159 | 0.0   | 3.0   |
| PREDICTED: similar to protein kinase, DNA-activated, catalytic polypeptide | unknown                                        | 113430845 | 29.7  | 62.3  |
| PREDICTED: hypothetical protein XP_002342225                               | unknown                                        | 239741460 | 0.0   | 21.0  |

|                                                            |         |           |      |      |
|------------------------------------------------------------|---------|-----------|------|------|
| translocase of inner mitochondrial membrane 50 homolog     | unknown | 48526509  | 3.7  | 37.3 |
| sulfide dehydrogenase like                                 | unknown | 10864011  | 10.3 | 20.7 |
| fragile X mental retardation-related protein 1 isoform a   | unknown | 61835148  | 0.7  | 10.3 |
| sterile alpha motif domain containing 4B                   | unknown | 55742695  | 0.0  | 7.7  |
| basic leucine zipper and W2 domains 1                      | unknown | 41281429  | 0.0  | 6.7  |
| resistance to inhibitors of cholinesterase 8 homolog A     | unknown | 27883866  | 0.0  | 6.3  |
| signal recognition particle 68kDa                          | unknown | 24497620  | 0.0  | 4.7  |
| UBX domain containing 8                                    | unknown | 24797106  | 0.0  | 4.3  |
| hematological and neurological expressed 1 isoform 1       | unknown | 7705877   | 0.0  | 4.0  |
| basophilic leukemia expressed protein BLES03 isoform 2     | unknown | 208431769 | 0.0  | 4.0  |
| small nuclear ribonucleoprotein polypeptide A              | unknown | 4759156   | 0.0  | 3.7  |
| inosine triphosphatase isoform a                           | unknown | 15626999  | 0.0  | 3.7  |
| nucleolar protein 1, 120kDa                                | unknown | 76150623  | 0.0  | 3.7  |
| zinc finger protein 9 isoform 3                            | unknown | 4827071   | 0.0  | 3.3  |
| TIP41, TOR signalling pathway regulator-like isoform 1     | unknown | 23097250  | 0.0  | 3.3  |
| LAG1 longevity assurance 2                                 | unknown | 31077094  | 0.0  | 3.3  |
| ras homolog gene family, member G                          | unknown | 46249393  | 0.0  | 3.3  |
| colonic and hepatic tumor over-expressed protein isoform a | unknown | 57164942  | 0.0  | 3.3  |
| breast cancer membrane protein 11                          | unknown | 28827801  | 0.0  | 3.0  |
| DEAD (Asp-Glu-Ala-Asp) box polypeptide 18                  | unknown | 38327634  | 0.0  | 3.0  |
| KDEL (Lys-Asp-Glu-Leu) containing 2                        | unknown | 153218487 | 0.0  | 3.0  |
| elongation of very long chain fatty acids-like 2           | unknown | 157388945 | 0.0  | 3.0  |

<sup>a</sup>Functional annotation is based on Protein Knowledgebase at <http://www.uniprot.org>.
